# Supplementary material for: Activation of c-MET Induces a Stem-Like Phenotype in Human Prostate Cancer
Source: PubMed Central journal article supplement (PMC3215704; doi:10.1371/journal.pone.0026753), 2011-11-14
Supplement: pone.0026753.s001.pdf [file pone.0026753.s001.pdf]

**Table S1. Primers and cycli number for RT-PCR of Notch receptors and ligands**

| Gene     | Cycli | Forward primer<br>5' – 3' | Reverse primers<br>5' – 3' |
|----------|-------|---------------------------|----------------------------|
| Dll-1    | 29    | AGGACCTCAAGGGTGACGAC      | GAAGTTGAACAGCCCGAGTC       |
| Dll-4    | 29    | GAAAAGCCAGAGTGTCGGATA     | AATGCAGAAGGAAGGTCCAG       |
| HES-1    | 29    | CGGACATTCTGGAAATGACA      | GTGCGCACCTCGGTATTAAC       |
| Jagged-1 | 29    | AAACGTGATGGAAACAGCTC      | AGTAGAAGGCCGTCACCAAG       |
| Jagged-2 | 24    | GGAACAGCTCACTGCTCCTG      | CTCCTCTCCCGCTCTTTCCT       |
| Notch-1  | 28    | GCAGTTGTGCTCCTGAAGAA      | CGGTCCATATGATCCGTGA        |
| Notch-2  | 28    | GGATGTGAATGCAGTGGATG      | CAGGATCTTGGCTGCTTCAT       |
| Notch-3  | 28    | GGATGAGCTTGGGAAATCAG      | CAGCTTGGCAGCCTCATAG        |
