# Supplementary material for: Activation of c-MET Induces a Stem-Like Phenotype in Human Prostate Cancer
Source: PubMed Central journal article supplement (PMC3215704; doi:10.1371/journal.pone.0026753), 2011-11-14
Supplement: pone.0026753.s002.pdf [file pone.0026753.s002.pdf]

**Table S2. HGF induced gene-expression in DU145 cell line**

| Gene Identifiers |             |           | 2log ratios HGF <i>versus</i> no HGF |         |          | overall raw expression |
|------------------|-------------|-----------|--------------------------------------|---------|----------|------------------------|
| UniGene          | Gene symbol | LocusLink | 2 hours                              | 8 hours | 24 hours | EV                     |
| Hs.83169         | MMP1        | 4312      | 0,04                                 | 0,04    | 4,75     | 265,2                  |
| Hs.227817        | BCL2A1      | 597       | 0,73                                 | 1,78    | 3,51     | 124,1                  |
| Hs.25590         | STC1        | 6781      | 1,33                                 | 1,80    | 3,16     | 191,1                  |
| Hs.2316          | SOX9        | 6662      | 1,88                                 | 2,46    | 2,53     | 249,5                  |
| Hs.624           | IL8         | 3576      | 2,21                                 | 1,27    | 2,49     | 873,7                  |
| Hs.482077        | ITGA2       | 3673      | -0,07                                | 0,24    | 2,32     | 139,7                  |
| Hs.118140        | DOCK4       | 9732      | -0,02                                | -0,41   | 2,24     | 101,3                  |
| Hs.370410        | KIAA1145    | 57458     | 0,26                                 | 0,81    | 2,23     | 37,5                   |
| Hs.35861         | RIS1        | 25907     | 0,33                                 | 1,74    | 2,16     | 638,2                  |
| Hs.432132        | G0S2        | 50486     | 1,50                                 | 1,78    | 1,94     | 882,5                  |
| Hs.143250        | TNC         | 3371      | 0,04                                 | 0,19    | 1,93     | 40,6                   |
| Hs.78944         | RGS2        | 5997      | 0,88                                 | 0,68    | 1,92     | 673,8                  |
| Hs.298654        | DUSP6       | 1848      | 1,81                                 | 1,81    | 1,91     | 345,0                  |
| Hs.459265        | ISG20       | 3669      | 0,25                                 | 1,40    | 1,91     | 264,2                  |
| Hs.147279        | EOMES       | 8320      | -0,17                                | 1,08    | 1,89     | 80,4                   |
| Hs.522632        | TIMP1       | 7076      | 0,26                                 | 2,36    | 1,86     | 2858,1                 |
| Hs.370771        | CDKN1A      | 1026      | 2,14                                 | 2,51    | 1,84     | 374,0                  |
| Hs.61635         | STEAP       | 26872     | -0,26                                | -0,26   | 1,83     | 230,4                  |
| Hs.133397        | ITGA6       | 3655      | 0,19                                 | -0,75   | 1,83     | 118,6                  |
| Hs.136164        | TSPYL2      | 64061     | -0,08                                | 0,18    | 1,78     | 178,3                  |
| Hs.306322        | NAV3        | 89795     | -0,56                                | 0,14    | 1,72     | 29,8                   |
| Hs.10082         | KCNN4       | 3783      | 0,31                                 | 1,59    | 1,71     | 176,3                  |
| Hs.24907         | CORO2B      | 10391     | 0,00                                 | 1,42    | 1,67     | 16,9                   |
| Hs.323308        | SPRY4       | 81848     | 1,20                                 | 1,57    | 1,63     | 44,5                   |
| Hs.106857        | CALB2       | 794       | -0,16                                | 0,37    | 1,60     | 54,5                   |
| Hs.406691        | HIST1H2AJ   | 8331      | -0,25                                | -1,03   | 1,59     | 80,4                   |
| Hs.326035        | EGR1        | 1958      | 1,73                                 | 2,24    | 1,59     | 884,8                  |
| Hs.250666        | HES1        | 3280      | 0,92                                 | 1,08    | 1,58     | 68,5                   |
| Hs.459709        | PRSS22      | 64063     | 0,51                                 | 1,27    | 1,57     | 74,8                   |
| Hs.516484        | S100A2      | 6273      | 0,32                                 | 1,63    | 1,57     | 565,2                  |
| Hs.103527        | SH2D2A      | 9047      | 0,00                                 | 1,06    | 1,56     | 46,2                   |
| Hs.486818        | TTF2        | 8458      | 0,35                                 | -0,18   | 1,53     | 101,5                  |
| Hs.789           | CXCL1       | 2919      | 1,99                                 | 0,84    | 1,52     | 256,8                  |

| Gene Identifiers |             |           | 2log ratios HGF versus no HGF |         |          | overall raw expression |
|------------------|-------------|-----------|-------------------------------|---------|----------|------------------------|
| UniGene          | Gene symbol | LocusLink | 2 hours                       | 8 hours | 24 hours | EV                     |
| Hs.154299        | F2RL1       | 2150      | 0,43                          | 0,55    | 1,52     | 118,4                  |
| Hs.371240        | AKAP12      | 9590      | 0,30                          | 0,51    | 1,51     | 165,7                  |
| Hs.89690         | CXCL3       | 2921      | 1,21                          | 0,19    | 1,50     | 54,4                   |
| Hs.157726        | AK000477    | 440462    | 0,35                          | 0,36    | 1,49     | 25,8                   |
| Hs.411311        | IL24        | 11009     | 0,05                          | 0,97    | 1,49     | 45,0                   |
| Hs.443727        | LHX1        | 3975      | 1,24                          | 0,91    | 1,49     | 73,5                   |
| Hs.472054        | C20orf42    | 55612     | 0,09                          | 0,18    | 1,45     | 105,7                  |
| Hs.9613          | ANGPTL4     | 51129     | 1,89                          | 2,34    | 1,44     | 299,8                  |
| Hs.79741         | FLJ10116    | 55686     | -0,08                         | 0,48    | 1,44     | 137,7                  |
| Hs.127189        | CA13        | 377677    | 0,40                          | 0,19    | 1,42     | 116,6                  |
| Hs.2030          | THBD        | 7056      | 0,00                          | 1,25    | 1,41     | 43,0                   |
| Hs.466871        | PLAUR       | 5329      | 0,81                          | 1,80    | 1,41     | 1176,1                 |
| Hs.268887        | STK17A      | 9263      | 0,17                          | 0,33    | 1,41     | 232,9                  |
| Hs.2399          | MMP14       | 4323      | -0,43                         | 0,58    | 1,40     | 39,9                   |
| Hs.345139        | GEM         | 2669      | 0,46                          | 0,62    | 1,40     | 94,7                   |
| Hs.503763        | LOC91801    | 91801     | -0,33                         | -0,56   | 1,40     | 98,4                   |
| Hs.506784        | LNK         | 10019     | 0,22                          | 1,30    | 1,40     | 142,5                  |
| Hs.521540        | LETM2       | 137994    | 0,00                          | 0,99    | 1,40     | 58,1                   |
| Hs.524528        | CYP27B1     | 1594      | 0,21                          | 0,77    | 1,39     | 131,0                  |
| Hs.155342        | PRKCD       | 5580      | -0,01                         | 1,45    | 1,38     | 198,1                  |
| Hs.464848        | B4GALT6     | 9331      | 0,08                          | -0,55   | 1,37     | 59,9                   |
| Hs.8261          | SSB1        | 80176     | 0,12                          | 1,24    | 1,36     | 36,5                   |
| Hs.133539        | KIAA0303    | 23227     | 0,30                          | 0,79    | 1,35     | 42,1                   |
| Hs.149156        | GLDC        | 2731      | 0,07                          | 0,79    | 1,34     | 225,9                  |
| Hs.444959        | ACOX2       | 8309      | -0,31                         | 0,96    | 1,34     | 186,5                  |
| Hs.46523         | ELK3        | 2004      | -0,01                         | 0,05    | 1,34     | 432,1                  |
| Hs.99196         | MGC11324    | 84803     | 0,28                          | 0,14    | 1,33     | 346,3                  |
| Hs.107740        | KLF2        | 10365     | 0,63                          | 1,38    | 1,33     | 49,6                   |
| Hs.368077        | SERPINB8    | 5271      | 0,42                          | 0,46    | 1,33     | 65,7                   |
| Hs.505654        | ITGA5       | 3678      | 0,01                          | 1,36    | 1,32     | 280,6                  |
| Hs.517400        | PEX26       | 55670     | -0,08                         | 0,31    | 1,32     | 87,6                   |
| Hs.799           | DTR         | 1839      | 1,51                          | 1,33    | 1,31     | 283,3                  |
| Hs.3843          | DUSP7       | 1849      | 0,20                          | 1,86    | 1,31     | 87,1                   |
| Hs.68061         | SPHK1       | 8877      | 0,25                          | 1,82    | 1,31     | 86,3                   |
| Hs.481720        | MYO10       | 4651      | -0,14                         | 0,01    | 1,28     | 55,8                   |

| Gene Identifiers |             |           | 2log ratios HGF versus no HGF |         |          | overall raw expression |
|------------------|-------------|-----------|-------------------------------|---------|----------|------------------------|
| UniGene          | Gene symbol | LocusLink | 2 hours                       | 8 hours | 24 hours | EV                     |
| Hs.489365        | AP1S1       | 1174      | 0,25                          | -0,69   | 1,28     | 217,1                  |
| Hs.247828        | RPL23AP7    | 118433    | -0,36                         | 0,05    | 1,27     | 139,8                  |
| Hs.435003        | RCE1        | 9986      | 0,10                          | 1,06    | 1,27     | 62,8                   |
| Hs.283378        | LOC253981   | 253981    | -0,07                         | 0,00    | 1,26     | 338,5                  |
| Hs.435120        | KIF1C       | 10749     | -0,45                         | 1,04    | 1,25     | 31,7                   |
| Hs.438231        | TFPI2       | 7980      | 0,91                          | 0,14    | 1,25     | 2180,3                 |
| Hs.166313        | RGS17       | 26575     | 0,20                          | -0,31   | 1,24     | 46,3                   |
| Hs.546297        | SLC20A1     | 6574      | 0,46                          | 1,06    | 1,24     | 1456,4                 |
| Hs.170473        | PLEK2       | 26499     | 0,15                          | 1,34    | 1,23     | 450,8                  |
| Hs.111164        | MGC33993    | 221687    | -0,25                         | 0,84    | 1,22     | 93,9                   |
| Hs.149098        | SMTN        | 6525      | 0,30                          | 1,74    | 1,22     | 40,5                   |
| Hs.468099        | MGC11061    | 84272     | -0,01                         | -0,76   | 1,22     | 48,7                   |
| Hs.505777        | DDIT3       | 1649      | 1,24                          | -0,06   | 1,22     | 243,3                  |
| Hs.440025        | KIAA0247    | 9766      | 0,47                          | 0,19    | 1,21     | 101,9                  |
| Hs.101150        | KIAA1949    | 170954    | 0,25                          | 2,10    | 1,20     | 868,9                  |
| Hs.162902        | AOF1        | 221656    | 0,19                          | -0,50   | 1,20     | 94,3                   |
| Hs.391828        | PARD6B      | 84612     | 0,77                          | -0,41   | 1,20     | 162,4                  |
| Hs.418123        | CTSL        | 1514      | 0,51                          | 0,94    | 1,20     | 660,7                  |
| Hs.379821        | BJ-TSA-9    | 84985     | 0,17                          | 1,77    | 1,20     | 543,9                  |
| Hs.250072        | SLC4A7      | 9497      | 0,33                          | -0,42   | 1,19     | 156,7                  |
| Hs.507162        | FLJ12750    | 79720     | 1,09                          | 1,68    | 1,19     | 126,3                  |
| Hs.476093        | CDCP1       | 64866     | 0,48                          | 0,95    | 1,19     | 720,1                  |
| Hs.504187        | ASAM        | 79827     | 0,09                          | -0,03   | 1,18     | 31,5                   |
| Hs.513971        | FLJ34018    |           | 0,19                          | -1,00   | 1,18     | 79,7                   |
| Hs.519313        | AF5Q31      | 27125     | 0,07                          | -0,53   | 1,17     | 58,0                   |
| Hs.417962        | DUSP4       | 1846      | 1,01                          | 0,50    | 1,16     | 77,5                   |
| Hs.503165        | CENTD2      | 116985    | 0,02                          | 1,21    | 1,16     | 82,0                   |
| Hs.271272        | BTBD11      | 121551    | -0,08                         | 1,27    | 1,16     | 45,4                   |
| Hs.512776        | LTBP2       | 4053      | -0,16                         | -0,02   | 1,16     | 55,3                   |
| Hs.518805        | HMGA1       | 3159      | 0,17                          | 1,12    | 1,16     | 1022,4                 |
| Hs.480694        | KIAA1223    | 57182     | 0,46                          | -0,43   | 1,15     | 92,4                   |
| Hs.149239        | EFNB2       | 1948      | 0,32                          | 0,49    | 1,15     | 32,0                   |
| Hs.189075        | PTK9        | 5756      | 0,05                          | -0,99   | 1,15     | 280,6                  |
| Hs.521989        | PDCD1LG1    | 29126     | 1,36                          | 0,65    | 1,15     | 66,4                   |
| Hs.187459        | ZDHHC14     | 79683     | 0,48                          | 0,15    | 1,14     | 25,7                   |

| Gene Identifiers |              |           | 2log ratios HGF versus no HGF |         |          | overall raw expression |
|------------------|--------------|-----------|-------------------------------|---------|----------|------------------------|
| UniGene          | Gene symbol  | LocusLink | 2 hours                       | 8 hours | 24 hours | EV                     |
| Hs.431550        | MAP4K4       | 9448      | -0,10                         | -0,90   | 1,14     | 68,0                   |
| Hs.4892          | Clone 24841  |           | 0,00                          | 0,04    | 1,13     | 44,2                   |
| Hs.97316         | NGEF         | 25791     | 0,18                          | 1,35    | 1,13     | 26,8                   |
| Hs.111554        | ARL7         | 10123     | 0,19                          | 1,01    | 1,13     | 76,6                   |
| Hs.224607        | SDC1         | 6382      | 0,27                          | 1,16    | 1,13     | 862,9                  |
| Hs.505516        | KIAA1463     | 57609     | 0,16                          | -0,03   | 1,13     | 37,4                   |
| Hs.104879        | SERPINB9     | 5272      | 0,21                          | 0,25    | 1,12     | 84,9                   |
| Hs.466937        | PPP1R13L     | 10848     | -0,24                         | 0,92    | 1,12     | 74,9                   |
| Hs.517228        | TIAM1        | 7074      | 0,14                          | 0,09    | 1,12     | 86,4                   |
| Hs.162963        | ANTXR2       | 118429    | 0,48                          | 0,34    | 1,12     | 49,4                   |
| Hs.283148        | RAB38        | 23682     | -0,47                         | 0,26    | 1,11     | 56,2                   |
| Hs.446705        | RFFL         | 117584    | -0,01                         | 0,45    | 1,11     | 39,4                   |
| Hs.471768        | MGC4796      | 83931     | 1,19                          | 1,75    | 1,11     | 44,7                   |
| Hs.529322        | APG16L       | 55054     | 1,04                          | 1,14    | 1,11     | 51,4                   |
| Hs.202517        | DKFZp762O076 | 55529     | -0,30                         | 0,67    | 1,10     | 71,9                   |
| Hs.465529        | MIDN         | 90007     | 1,99                          | 0,13    | 1,10     | 59,2                   |
| Hs.530509        | LAMC2        | 3918      | 0,09                          | 0,05    | 1,10     | 154,4                  |
| Hs.40910         | CPNE8        | 144402    | -0,01                         | -0,33   | 1,10     | 137,4                  |
| Hs.23862         | PHCA         | 55331     | -0,19                         | -1,04   | 1,10     | 162,4                  |
| Hs.8379          | CS0DJ001YJ05 |           | 0,72                          | -0,31   | 1,09     | 192,6                  |
| Hs.189641        | SEC24D       | 9871      | 0,22                          | 0,67    | 1,09     | 31,6                   |
| Hs.526928        | SLC35E4      | 339665    | 0,00                          | 1,76    | 1,09     | 49,6                   |
| Hs.98445         | FLJ21652     |           | 0,31                          | -0,73   | 1,08     | 353,0                  |
| Hs.199248        | PTGER4       | 5734      | 0,93                          | 0,36    | 1,08     | 210,9                  |
| Hs.436298        | EMP1         | 2012      | 0,45                          | 0,59    | 1,08     | 43,8                   |
| Hs.486596        | NHSL1        | 57224     | 0,76                          | 0,69    | 1,08     | 24,0                   |
| Hs.531406        | LOC286073    | 286073    | -0,19                         | -0,22   | 1,08     | 110,5                  |
| Hs.28988         | GLRX         | 2745      | -0,18                         | -0,27   | 1,08     | 196,6                  |
| Hs.444947        | TRIB1        | 10221     | 2,00                          | 1,78    | 1,07     | 182,8                  |
| Hs.477921        | WWTR1        | 25937     | 0,19                          | 0,38    | 1,07     | 505,7                  |
| Hs.505924        | HMGA2        | 8091      | 0,00                          | 0,10    | 1,07     | 15,3                   |
| Hs.488240        | UPP1         | 7378      | 0,39                          | 1,33    | 1,06     | 2407,9                 |
| Hs.288193        | KPNA4        | 3840      | 0,24                          | 0,03    | 1,05     | 753,1                  |
| Hs.355983        | BZW1         | 9689      | 0,07                          | -0,51   | 1,05     | 2530,1                 |
| Hs.368157        | PYGB         | 5834      | 0,18                          | 1,16    | 1,05     | 187,1                  |

| Gene Identifiers |             |           | 2log ratios HGF versus no HGF |         |          | overall raw expression |
|------------------|-------------|-----------|-------------------------------|---------|----------|------------------------|
| UniGene          | Gene symbol | LocusLink | 2 hours                       | 8 hours | 24 hours | EV                     |
| Hs.377028        | C4.4A       | 27076     | 0,97                          | 1,52    | 1,05     | 125,2                  |
| Hs.192221        | ELL2        | 22936     | 0,78                          | -0,21   | 1,04     | 61,5                   |
| Hs.25155         | NET1        | 10276     | 0,11                          | -0,49   | 1,04     | 212,8                  |
| Hs.435850        | LYPLA1      | 10434     | 0,11                          | -0,28   | 1,04     | 1830,2                 |
| Hs.459072        | LOC58489    | 58489     | -0,13                         | 0,68    | 1,04     | 227,9                  |
| Hs.489051        | STEAP2      | 261729    | 0,14                          | -0,71   | 1,04     | 51,2                   |
| Hs.18676         | SPRY2       | 10253     | 0,32                          | 1,15    | 1,03     | 211,0                  |
| Hs.167165        | FLJ12975    | 79867     | -0,51                         | -0,58   | 1,03     | 30,8                   |
| Hs.244940        | RDH10       | 157506    | -0,08                         | 0,18    | 1,03     | 163,8                  |
| Hs.6846          | LPPR2       | 64748     | -0,41                         | 0,16    | 1,02     | 38,9                   |
| Hs.112405        | S100A9      | 6280      | 0,00                          | 0,00    | 1,02     | 26,3                   |
| Hs.117167        | LOC283537   | 283537    | -0,29                         | -0,35   | 1,02     | 100,2                  |
| Hs.433297        | C10orf75    | 90271     | -0,06                         | -0,20   | 1,02     | 64,0                   |
| Hs.493401        | UHRF2       | 115426    | -0,38                         | -0,39   | 1,02     | 416,5                  |
| Hs.513633        | GPR56       | 9289      | 0,00                          | 1,37    | 1,02     | 26,6                   |
| Hs.203691        | DCBLD2      | 131566    | -0,09                         | -0,71   | 1,02     | 283,7                  |
| Hs.44766         | RP2         | 6102      | 0,20                          | -0,30   | 1,01     | 32,7                   |
| Hs.110642        | NTSR1       | 4923      | 0,00                          | 0,00    | 1,01     | 19,7                   |
| Hs.244723        | CCNE1       | 898       | 0,30                          | 1,05    | 1,01     | 113,7                  |
| Hs.336994        | MTSS1       | 9788      | -0,10                         | -0,42   | 1,01     | 13,6                   |
| Hs.485938        | RRAGD       | 58528     | -0,40                         | 0,07    | 1,01     | 118,0                  |
| Hs.489722        | ZNF277      | 11179     | -0,45                         | -1,04   | 1,01     | 73,7                   |
| Hs.66            | IL1RL1      | 9173      | 0,00                          | 0,06    | 1,00     | 20,7                   |
| Hs.26608         | C20orf100   | 84969     | -0,13                         | 1,43    | 1,00     | 119,6                  |
| Hs.80342         | KRT15       | 3866      | 0,00                          | 0,52    | 1,00     | 39,6                   |
| Hs.211933        | COL13A1     | 1305      | 0,47                          | 0,29    | 1,00     | 69,4                   |
| Hs.497723        | MGC27165    | 283650    | -0,75                         | 1,28    | 1,00     | 14,8                   |
| Hs.515011        | SMURF2      | 64750     | 0,10                          | -0,06   | 1,00     | 287,1                  |
| Hs.533635        | KAB         | 9859      | 0,10                          | -0,68   | 1,00     | 375,0                  |
| Hs.213424        | SFRP1       | 6422      | 0,17                          | 0,57    | 0,99     | 72,2                   |
| Hs.98643         | RAP2B       | 5912      | 0,07                          | 0,39    | 0,99     | 287,7                  |
| Hs.502328        | CD44        | 960       | 0,13                          | 0,65    | 0,98     | 65,0                   |
| Hs.509909        | NUMB        | 8650      | 0,29                          | 0,27    | 0,97     | 111,4                  |
| Hs.128791        | CGI-09      | 51605     | 0,30                          | 0,08    | 0,97     | 364,6                  |
| Hs.459153        | BNC1        | 646       | 0,72                          | 0,15    | 0,97     | 101,8                  |

| Gene Identifiers |               |           | 2log ratios HGF versus no HGF |         |          | overall raw expression |
|------------------|---------------|-----------|-------------------------------|---------|----------|------------------------|
| UniGene          | Gene symbol   | LocusLink | 2 hours                       | 8 hours | 24 hours | EV                     |
| Hs.200770        | SCAP2         | 8935      | -0,27                         | -0,86   | 0,96     | 193,0                  |
| Hs.29692         | FLJ36031      | 168455    | 0,54                          | 0,85    | 0,96     | 77,8                   |
| Hs.153952        | NT5E          | 4907      | 0,36                          | 0,17    | 0,96     | 413,6                  |
| Hs.231295        | PITPNC1       | 26207     | -0,49                         | 1,26    | 0,95     | 72,3                   |
| Hs.334873        | CPM           | 1368      | 0,04                          | 0,38    | 0,94     | 143,7                  |
| Hs.89714         | CXCL5         | 6374      | 0,27                          | -0,66   | 0,93     | 607,3                  |
| Hs.281348        | CCNJ          | 54619     | 0,73                          | -1,08   | 0,92     | 36,0                   |
| Hs.13680         | AK092922      | 440426    | 0,35                          | 0,34    | 0,92     | 172,9                  |
| Hs.59214         | DNAJC3        | 5611      | -0,19                         | -1,07   | 0,91     | 62,0                   |
| Hs.200250        | CREM          | 1390      | 0,41                          | 0,05    | 0,91     | 46,3                   |
| Hs.518857        | SMARCA5       | 8467      | -0,20                         | -1,13   | 0,91     | 523,0                  |
| Hs.525704        | JUN           | 3725      | 0,99                          | 0,91    | 0,90     | 193,6                  |
| Hs.269857        | HRB2          | 11103     | -0,02                         | -0,63   | 0,89     | 292,8                  |
| Hs.335079        | MAP1B         | 4131      | 0,16                          | -1,82   | 0,89     | 314,8                  |
| Hs.434059        | ETV4          | 2118      | -0,25                         | 1,03    | 0,89     | 145,8                  |
| Hs.467740        | LPIN1         | 23175     | 0,46                          | -0,05   | 0,87     | 228,9                  |
| Hs.468426        | SOCS5         | 9655      | -0,05                         | -0,83   | 0,86     | 150,9                  |
| Hs.495138        | MAPKAP1       | 79109     | 0,13                          | 0,42    | 0,86     | 294,2                  |
| Hs.93667         | C10orf78      | 119392    | -0,39                         | -0,93   | 0,85     | 334,9                  |
| Hs.115166        | SCEL          | 8796      | -0,21                         | -0,73   | 0,84     | 74,5                   |
| Hs.227777        | PTP4A1        | 7803      | 0,18                          | -1,24   | 0,84     | 590,8                  |
| Hs.532826        | MCL1          | 4170      | 0,78                          | 0,02    | 0,83     | 730,2                  |
| Hs.419195        | FLJ35954      | 166968    | -0,20                         | -1,30   | 0,82     | 56,1                   |
| Hs.208267        | B3GNT5        | 84002     | 0,53                          | -1,02   | 0,82     | 91,4                   |
| Hs.514500        | MGC29814      | 283991    | -0,25                         | 1,16    | 0,82     | 211,2                  |
| Hs.6790          | DNAJB9        | 4189      | -0,18                         | -0,64   | 0,80     | 92,2                   |
| Hs.91389         | LOC169932     |           | 0,12                          | -0,70   | 0,80     | 73,8                   |
| Hs.133183        | LOC284591     | 284591    | 0,05                          | 0,02    | 0,80     | 53,2                   |
| Hs.287362        | TLE3          | 7090      | 0,56                          | 0,98    | 0,79     | 44,8                   |
| Hs.82101         | PHLDA1        | 22822     | 1,30                          | 0,57    | 0,79     | 719,7                  |
| Hs.144795        | KCNMA1        | 3778      | -0,16                         | 0,11    | 0,79     | 58,7                   |
| Hs.532265        | DKFZP564O0463 | 25879     | -0,16                         | -0,82   | 0,78     | 533,6                  |
| Hs.375684        | RAD18         | 56852     | -0,07                         | -0,58   | 0,78     | 87,5                   |
| Hs.173484        | LRRC8         | 56262     | 0,68                          | 0,96    | 0,77     | 444,1                  |
| Hs.213467        | TNFRSF10D     | 8793      | 0,34                          | -0,02   | 0,76     | 199,4                  |

| Gene Identifiers |             |           | 2log ratios HGF versus no HGF |         |          | overall raw expression |
|------------------|-------------|-----------|-------------------------------|---------|----------|------------------------|
| UniGene          | Gene symbol | LocusLink | 2 hours                       | 8 hours | 24 hours | EV                     |
| Hs.434269        | ARNTL2      | 56938     | -0,42                         | -0,47   | 0,75     | 72,1                   |
| Hs.268742        | C13orf12    | 51371     | 0,10                          | 0,34    | 0,74     | 1929,6                 |
| Hs.469723        | CHC1        | 1104      | -0,11                         | -0,10   | 0,74     | 198,4                  |
| Hs.530791        | LOC388114   | 388114    | 0,17                          | 0,30    | 0,74     | 108,2                  |
| Hs.357901        | SOX4        | 6659      | -0,61                         | -0,09   | 0,73     | 39,2                   |
| Hs.435981        | ERCC1       | 2067      | 0,01                          | 1,51    | 0,73     | 298,7                  |
| Hs.196983        | SSFA2       | 6744      | 0,25                          | -0,49   | 0,73     | 111,1                  |
| Hs.235069        | RECQL       | 5965      | -0,30                         | -1,26   | 0,72     | 194,0                  |
| Hs.369052        | SELT        | 51714     | -0,35                         | -1,51   | 0,71     | 366,4                  |
| Hs.477009        | USP24       | 23358     | -0,25                         | -1,14   | 0,71     | 134,2                  |
| Hs.178357        | C9orf82     | 79886     | 0,22                          | -0,19   | 0,70     | 154,1                  |
| Hs.48343         | MGC26963    | 166929    | 0,26                          | -0,90   | 0,68     | 106,3                  |
| Hs.103915        | JMJD3       | 23135     | 1,57                          | 1,06    | 0,68     | 95,5                   |
| Hs.118722        | FUT8        | 2530      | -0,05                         | -0,49   | 0,68     | 53,0                   |
| Hs.20084         | RXRA        | 6256      | -0,27                         | 0,70    | 0,68     | 112,0                  |
| Hs.533468        | FAM29A      | 54801     | -0,15                         | -1,11   | 0,67     | 166,7                  |
| Hs.85962         | HAS3        | 3038      | 0,18                          | 0,72    | 0,67     | 413,4                  |
| Hs.472010        | PRNP        | 5621      | -0,07                         | -0,42   | 0,65     | 917,5                  |
| Hs.28491         | SAT         | 6303      | 0,54                          | -0,02   | 0,64     | 848,0                  |
| Hs.509545        | PBX2        | 5089      | 0,36                          | -0,09   | 0,64     | 111,5                  |
| Hs.520506        | FBXO5       | 26271     | -0,13                         | -0,75   | 0,63     | 244,1                  |
| Hs.497822        | DUSP10      | 11221     | 0,19                          | 0,38    | 0,61     | 49,8                   |
| Hs.512932        | FLJ13213    | 79811     | -0,06                         | -0,36   | 0,61     | 150,6                  |
| Hs.440049        | MGC11349    | 79364     | 0,55                          | 0,08    | 0,59     | 29,1                   |
| Hs.269092        | CDYL        | 9425      | 0,05                          | 0,09    | 0,58     | 328,1                  |
| Hs.406266        | HK2         | 3099      | 0,25                          | 0,56    | 0,58     | 140,5                  |
| Hs.209431        | MGC3794     | 261726    | -0,25                         | -0,71   | 0,57     | 154,2                  |
| Hs.516543        | AGPS        | 8540      | -0,16                         | -1,07   | 0,56     | 158,6                  |
| Hs.501513        | CGI-37      | 51388     | 0,39                          | 0,14    | 0,55     | 659,5                  |
| Hs.522590        | EIF1AX      | 1964      | -0,06                         | -1,08   | 0,54     | 504,9                  |
| Hs.510301        | hmd2a08m3   |           | -0,26                         | -0,33   | -0,50    | 94,7                   |
| Hs.435255        | UBXD1       | 80700     | 0,03                          | 0,71    | -0,52    | 206,5                  |
| Hs.482034        | FLJ21657    | 64417     | 0,06                          | -1,59   | -0,53    | 186,9                  |
| Hs.471873        | DTYMK       | 1841      | -0,13                         | 0,55    | -0,53    | 293,5                  |
| Hs.516697        | MR-1        | 25953     | -0,11                         | 0,29    | -0,55    | 126,1                  |

| Gene Identifiers |               |           | 2log ratios HGF versus no HGF |         |          | overall raw expression |
|------------------|---------------|-----------|-------------------------------|---------|----------|------------------------|
| UniGene          | Gene symbol   | LocusLink | 2 hours                       | 8 hours | 24 hours | EV                     |
| Hs.269512        | FSTL1         | 11167     | -0,18                         | -0,69   | -0,56    | 267,5                  |
| Hs.414099        | TNRC5         | 10695     | -0,05                         | 0,51    | -0,56    | 103,5                  |
| Hs.410970        | MYL5          | 4636      | -0,26                         | -0,18   | -0,57    | 40,9                   |
| Hs.516087        | TEX261        | 113419    | -0,23                         | 0,12    | -0,57    | 328,3                  |
| Hs.512894        | TRPM7         | 54822     | 0,10                          | -1,03   | -0,57    | 31,2                   |
| Hs.520189        | ELOVL5        | 60481     | 0,20                          | -0,26   | -0,57    | 684,4                  |
| Hs.461086        | CDH1          | 999       | 0,23                          | -0,39   | -0,58    | 405,6                  |
| Hs.437008        | EPHB4         | 2050      | 0,30                          | 0,26    | -0,62    | 114,7                  |
| Hs.500775        | ZNF207        | 7756      | 0,18                          | -0,86   | -0,62    | 472,1                  |
| Hs.505004        | TCEA2         | 6919      | -0,22                         | 0,62    | -0,64    | 106,6                  |
| Hs.376681        | MFN2          | 9927      | 0,18                          | 0,31    | -0,65    | 165,2                  |
| Hs.435126        | SLC2A4RG      | 56731     | -0,05                         | 0,29    | -0,65    | 130,8                  |
| Hs.414028        | C9orf116      | 138162    | -0,32                         | 0,17    | -0,66    | 53,8                   |
| Hs.175322        | USP13         | 8975      | -0,13                         | -0,77   | -0,66    | 171,2                  |
| Hs.100009        | CDK3          | 1018      | -0,55                         | -0,11   | -0,67    | 52,1                   |
| Hs.274408        | CASKIN2       | 57513     | -0,36                         | 0,07    | -0,67    | 32,9                   |
| Hs.536037        | IMAGE 6191529 |           | -0,06                         | -1,37   | -0,68    | 56,3                   |
| Hs.433995        | FLJ26120      |           | 1,10                          | -1,00   | -0,70    | 123,6                  |
| Hs.369554        | SLC16A5       | 9121      | 0,13                          | 0,33    | -0,70    | 139,7                  |
| Hs.375108        | CD24          | 934       | 0,06                          | -1,14   | -0,71    | 484,8                  |
| Hs.515003        | C19orf6       | 91304     | 0,20                          | -0,16   | -0,71    | 60,1                   |
| Hs.535030        | MGC13098      | 84820     | 0,11                          | -0,74   | -0,71    | 65,7                   |
| Hs.334305        | DGAT2         | 84649     | 0,20                          | 0,52    | -0,72    | 79,5                   |
| Hs.269654        | HSMPP8        | 54737     | 0,10                          | -0,82   | -0,72    | 52,2                   |
| Hs.370510        | IGSF4         | 23705     | 0,33                          | -0,81   | -0,73    | 64,7                   |
| Hs.471528        | C2orf33       | 56947     | -0,29                         | -0,53   | -0,78    | 1314,1                 |
| Hs.517366        | LSS           | 4047      | -0,08                         | 0,34    | -0,78    | 161,8                  |
| Hs.334534        | GNS           | 2799      | 0,09                          | -0,38   | -0,78    | 409,1                  |
| Hs.517666        | DIA1          | 1727      | -0,09                         | 0,46    | -0,78    | 1274,8                 |
| Hs.463511        | H6PD          | 9563      | 0,11                          | 0,48    | -0,84    | 41,2                   |
| Hs.472101        | PLCB4         | 5332      | -0,33                         | -1,89   | -0,84    | 63,1                   |
| Hs.204891        | IL11RA        | 3590      | -0,35                         | 0,40    | -0,85    | 65,3                   |
| Hs.524804        | LOC338799     | 338799    | -0,37                         | 0,18    | -0,85    | 47,4                   |
| Hs.143736        | C20orf108     | 116151    | -0,22                         | -0,98   | -0,86    | 141,0                  |
| Hs.122575        | EDG4          | 9170      | -0,10                         | 1,16    | -0,86    | 72,7                   |



| Gene Identifiers |             |           | 2log ratios HGF versus no HGF |         |          | overall raw expression |
|------------------|-------------|-----------|-------------------------------|---------|----------|------------------------|
| UniGene          | Gene symbol | LocusLink | 2 hours                       | 8 hours | 24 hours | EV                     |
| Hs.503998        | TAGLN       | 6876      | 0,63                          | 1,36    | -0,88    | 89,5                   |
| Hs.110571        | GADD45B     | 4616      | -0,61                         | -0,55   | -0,89    | 231,8                  |
| Hs.75798         | C20orf111   | 51526     | 0,20                          | -0,52   | -0,90    | 262,1                  |
| Hs.18376         | CGN         | 57530     | -0,18                         | -0,66   | -0,91    | 88,1                   |
| Hs.165859        | ANTXR1      | 84168     | 0,06                          | -0,44   | -0,91    | 131,3                  |
| Hs.157180        | IPP         | 3652      | -0,29                         | -0,27   | -0,93    | 44,0                   |
| Hs.142912        | FZD2        | 2535      | -0,66                         | -0,22   | -0,94    | 148,0                  |
| Hs.335163        | KIAA1102    | 22998     | -0,09                         | -1,29   | -0,94    | 55,4                   |
| Hs.472471        | C20orf178   | 128866    | 0,06                          | 0,21    | -0,95    | 482,5                  |
| Hs.408312        | TP53        | 7157      | -0,29                         | 0,22    | -0,96    | 252,0                  |
| Hs.293970        | ALDH6A1     | 4329      | 0,18                          | -0,28   | -0,97    | 81,9                   |
| Hs.423103        | HCFC1R1     | 54985     | -0,08                         | 0,52    | -0,98    | 184,9                  |
| Hs.105891        | TBC1D3      | 84218     | 0,11                          | -1,36   | -1,00    | 56,4                   |
| Hs.292375        | CHST13      | 166012    | 0,12                          | 0,24    | -1,00    | 26,0                   |
| Hs.482390        | TGFBR3      | 7049      | -0,42                         | -1,28   | -1,01    | 53,0                   |
| Hs.90756         | LOC152831   | 152831    | -0,16                         | -1,29   | -1,01    | 45,7                   |
| Hs.512029        | B3GNTL1     | 284208    | -0,72                         | 0,19    | -1,01    | 32,8                   |
| Hs.448468        | NEK8        | 284086    | -0,03                         | -0,64   | -1,02    | 58,1                   |
| Hs.446352        | ERBB2       | 2064      | 0,12                          | 0,36    | -1,03    | 95,7                   |
| Hs.148685        | GPRC5B      | 51704     | -0,25                         | 0,34    | -1,04    | 27,3                   |
| Hs.429434        | GAB2        | 9846      | -0,48                         | -0,56   | -1,04    | 13,9                   |
| Hs.532277        | ZNF250      | 58500     | -0,52                         | -0,06   | -1,04    | 44,1                   |
| Hs.463421        | ABCC3       | 8714      | 0,37                          | -0,37   | -1,05    | 188,6                  |
| Hs.25338         | PRSS23      | 11098     | -0,05                         | -0,74   | -1,05    | 596,6                  |
| Hs.414396        | PERQ1       | 64599     | -0,26                         | 0,00    | -1,05    | 21,3                   |
| Hs.513100        | ZSCAN2      | 54993     | -0,10                         | 0,04    | -1,05    | 24,1                   |
| Hs.520814        | TENS1       | 64759     | -0,09                         | -0,52   | -1,05    | 470,4                  |
| Hs.530792        | GCHFR       | 2644      | 0,03                          | 0,39    | -1,05    | 284,2                  |
| Hs.80642         | STAT4       | 6775      | -0,09                         | -1,66   | -1,06    | 83,2                   |
| Hs.134012        | C1QL1       | 10882     | -0,77                         | 0,99    | -1,06    | 96,8                   |
| Hs.408062        | KNSL8       | 89953     | -0,70                         | -0,59   | -1,06    | 29,8                   |
| Hs.194679        | WISP2       | 8839      | 0,05                          | -0,28   | -1,07    | 62,4                   |
| Hs.164226        | THBS1       | 7057      | 0,32                          | -0,96   | -1,08    | 136,1                  |
| Hs.185807        | COG7        | 91949     | -0,23                         | 0,21    | -1,08    | 71,3                   |
| Hs.422889        | NUDT6       | 11162     | -0,57                         | -0,04   | -1,08    | 82,2                   |

| Gene Identifiers |              |           | 2log ratios HGF versus no HGF |         |          | overall raw expression |
|------------------|--------------|-----------|-------------------------------|---------|----------|------------------------|
| UniGene          | Gene symbol  | LocusLink | 2 hours                       | 8 hours | 24 hours | EV                     |
| Hs.546389        | YBX2         | 51087     | 0,00                          | 0,56    | -1,09    | 47,8                   |
| Hs.476319        | FLJ10948     | 55268     | 0,51                          | 0,18    | -1,10    | 46,0                   |
| Hs.196177        | PHKG2        | 5261      | -0,26                         | 0,08    | -1,10    | 108,7                  |
| Hs.473256        | LAMA5        | 3911      | 0,05                          | -0,33   | -1,10    | 51,5                   |
| Hs.475055        | BIK          | 638       | 0,03                          | 0,01    | -1,10    | 56,8                   |
| Hs.517586        | MB           | 4151      | 0,13                          | 1,13    | -1,10    | 96,9                   |
| Hs.523789        | TncRNA       | 283131    | 0,69                          | -1,97   | -1,11    | 144,1                  |
| Hs.10136         | BPHL         | 670       | -0,33                         | 0,54    | -1,11    | 178,5                  |
| Hs.129126        | MGC10992     | 92922     | -0,22                         | 0,69    | -1,11    | 77,6                   |
| Hs.303197        | BCL7C        | 9274      | -0,07                         | 0,63    | -1,11    | 536,3                  |
| Hs.502745        | FADS2        | 9415      | -0,14                         | 1,28    | -1,11    | 180,7                  |
| Hs.516769        | EFHD1        | 80303     | -0,01                         | 0,10    | -1,11    | 43,7                   |
| Hs.127897        | RAPGEF1      | 2889      | 0,12                          | 0,33    | -1,12    | 59,6                   |
| Hs.516243        | TSRC1        | 54507     | 0,00                          | 0,85    | -1,12    | 47,5                   |
| Hs.328232        | GPC1         | 2817      | 0,20                          | 0,69    | -1,13    | 277,4                  |
| Hs.306834        | FKBP1B       | 2281      | -0,14                         | 0,65    | -1,13    | 49,1                   |
| Hs.484047        | KIBRA        | 23286     | 0,14                          | -0,19   | -1,15    | 72,4                   |
| Hs.31130         | TM7SF2       | 7108      | -0,62                         | 0,49    | -1,15    | 219,6                  |
| Hs.194411        | RAD52B       | 201299    | -0,14                         | 0,19    | -1,15    | 117,5                  |
| Hs.477375        | MYLK         | 4638      | -0,03                         | 0,12    | -1,18    | 78,5                   |
| Hs.158748        | SLC35F3      | 148641    | -0,17                         | -0,29   | -1,18    | 27,1                   |
| Hs.438419        | SLC29A3      | 55315     | -0,25                         | 0,43    | -1,18    | 69,2                   |
| Hs.381081        | PSMB9        | 5698      | -0,34                         | 0,30    | -1,19    | 844,0                  |
| Hs.128041        | ATP10A       | 57194     | 0,01                          | -0,53   | -1,20    | 36,2                   |
| Hs.89603         | MUC1         | 4582      | -0,17                         | 0,77    | -1,21    | 292,3                  |
| Hs.504908        | LMO3         | 55885     | -0,49                         | -1,80   | -1,22    | 179,8                  |
| Hs.546384        | GMPPB        | 29925     | -0,24                         | 0,99    | -1,22    | 151,7                  |
| Hs.434828        | HES7         | 84667     | 0,82                          | 0,87    | -1,23    | 56,5                   |
| Hs.19545         | FZD4         | 8322      | -0,17                         | -0,84   | -1,24    | 56,6                   |
| Hs.131810        | FLJ35976     | 284618    | 0,52                          | -1,41   | -1,25    | 58,1                   |
| Hs.70327         | CRIP1        | 1396      | -0,16                         | 0,65    | -1,26    | 1498,8                 |
| Hs.111903        | FCGRT        | 2217      | 0,51                          | 0,69    | -1,26    | 58,6                   |
| Hs.467545        | HSPG2        | 3339      | 0,02                          | -0,07   | -1,26    | 62,2                   |
| Hs.524790        | CS0DD005YE10 |           | 0,03                          | -0,09   | -1,26    | 120,0                  |
| Hs.98669         | ADPRHL1      | 113622    | -0,20                         | 0,50    | -1,27    | 54,5                   |

| Gene Identifiers |               |           | 2log ratios HGF versus no HGF |         |          | overall raw expression |
|------------------|---------------|-----------|-------------------------------|---------|----------|------------------------|
| UniGene          | Gene symbol   | LocusLink | 2 hours                       | 8 hours | 24 hours | EV                     |
| Hs.1162          | HLA-DMB       | 3109      | -0,54                         | -0,16   | -1,28    | 69,8                   |
| Hs.517070        | SLPI          | 6590      | -0,04                         | -0,01   | -1,28    | 159,7                  |
| Hs.546985        | DKFZp762C074  |           | 0,00                          | -1,24   | -1,29    | 35,4                   |
| Hs.458573        | PDGFRL        | 5157      | 0,03                          | 0,63    | -1,30    | 69,3                   |
| Hs.12106         | MMAB          | 326625    | -0,34                         | 0,60    | -1,32    | 100,1                  |
| Hs.463110        | ANXA8         | 244       | 0,24                          | -0,89   | -1,33    | 64,4                   |
| Hs.112423        | DKFZp58611420 | 222161    | -0,40                         | -1,64   | -1,34    | 44,3                   |
| Hs.26530         | SDPR          | 8436      | -0,50                         | -1,58   | -1,36    | 202,8                  |
| Hs.527524        | KIAA1280      | 55841     | -0,19                         | -0,22   | -1,36    | 38,9                   |
| Hs.387251        | EVI5          | 7813      | -0,75                         | 0,30    | -1,38    | 45,4                   |
| Hs.140978        | LOC144501     | 144501    | -0,33                         | -0,23   | -1,41    | 212,1                  |
| Hs.546392        | PLAC8         | 51316     | 0,00                          | -0,30   | -1,48    | 161,0                  |
| Hs.76224         | EFEMP1        | 2202      | -0,09                         | -0,73   | -1,51    | 188,3                  |
| Hs.502989        | UNC93B1       | 81622     | -0,06                         | 0,53    | -1,51    | 85,8                   |
| Hs.481879        | FLJ27323      |           | 0,35                          | -1,18   | -1,52    | 156,1                  |
| Hs.3797          | RAB26         | 25837     | 0,26                          | -0,66   | -1,56    | 116,6                  |
| Hs.447901        | RHOV          | 171177    | -0,30                         | -0,45   | -1,57    | 420,6                  |
| Hs.440829        | CEBPD         | 1052      | -0,18                         | -0,19   | -1,65    | 140,4                  |
| Hs.523841        | ALDH3B1       | 221       | -0,11                         | -0,20   | -1,66    | 128,3                  |
| Hs.146978        | GPR64         | 10149     | -0,29                         | -1,14   | -1,69    | 133,1                  |
| Hs.147895        | ZNF518        | 9849      | 0,48                          | -1,97   | -2,00    | 60,9                   |
| Hs.532596        | FLJ23566      |           | -0,26                         | -1,50   | -2,00    | 192,7                  |
| Hs.73708         | ANKRD2        | 26287     | -0,22                         | 0,21    | -2,31    | 108,1                  |
